# Supplementary material for: Alix‐normalized exosomal programmed death‐ligand 1 analysis in urine enables precision monitoring of urothelial cancer
Source: PubMed Central journal article supplement — Cancer Sci. 2024 Mar 13;115(5):1602–10. doi: 10.1111/cas.16106 (PMC11093207; doi:10.1111/cas.16106), 2024-03-13
Supplement: CAS-115-1602-s003.pdf [file CAS-115-1602-s003.pdf]

**Table S1.** Characteristics of patients

| <b>Baseline characteristics</b>     | <b>Patients with urothelial cancer (n=26)</b> |
|-------------------------------------|-----------------------------------------------|
| Age, median (range)                 | 74.5 (58-93)                                  |
| Type of cancer (%)                  |                                               |
| BCa                                 | 20 (76)                                       |
| UTUC                                | 3 (12)                                        |
| BCa combined with UTUC              | 3 (12)                                        |
| Tumor stage at diagnosis, n (%)     |                                               |
| T1/T2                               | 9 (35)                                        |
| T3/T4                               | 17 (65)                                       |
| Unknown                             | 0 (0)                                         |
| Grade, n (%)                        |                                               |
| I / II                              | 0 (0)                                         |
| III                                 | 25 (96)                                       |
| Unknown                             | 1 (4)                                         |
| Presence of bone metastases, n (%)  |                                               |
| Yes                                 | 5 (19)                                        |
| No                                  | 19 (73)                                       |
| Unknown                             | 2 (8)                                         |
| Presence of lymph node, n (%)       |                                               |
| Yes                                 | 15 (58)                                       |
| No                                  | 9 (35)                                        |
| Unknown                             | 2 (7)                                         |
| Presence of lung metastases, n (%)  |                                               |
| Yes                                 | 8 (31)                                        |
| No                                  | 16 (62)                                       |
| Unknown                             | 2 (7)                                         |
| Presence of liver metastases, n (%) |                                               |
| Yes                                 | 13 (50)                                       |
| No                                  | 11 (42)                                       |
| Unknown                             | 2 (8)                                         |
| Prior use of tecentriq, n (%)       |                                               |
| Yes                                 | 0 (0)                                         |
| No                                  | 26 (100)                                      |
